# Supplementary material for: Activatable molecular rotor based on bithiophene quinolinium toward viscosity detection in liquids
Source: Royal Society of Chemistry journal article supplement (doi:10.1039/d2ay00539e), 2022-01-01
Supplement: d2ay00539e1.pdf [file d2ay00539e1.pdf]

# Analytical Methods

## Electronic Supplementary Information

### **Activatable molecular rotor based on bithiophene quinolinium toward viscosity detection in liquid**

Lingfeng Xu<sup>1,2,\*</sup>, Jingyi Zhao<sup>1</sup>, Fangzhi Xiong<sup>1</sup>, Yanrong Huang<sup>3</sup>, Yan Sui<sup>1</sup>

*1 School of Chemistry and Chemical Engineering, Jinggangshan University, Ji'an, Jiangxi 343009, China*

*2 State Key Laboratory of Luminescent Materials & Devices, College of Materials Science & Engineering, South*

*China University of Technology, Guangzhou 510640, China*

*3 School of Food Science and Engineering, Guangdong Province Key Laboratory for Green Processing of Natural*

*Products and Product Safety, South China University of Technology, Guangzhou 510640, China*

*\* Corresponding author. E-mail: [rs7lfxu@outlook.com](mailto:rs7lfxu@outlook.com).*

## Table of contents

|                                    |    |
|------------------------------------|----|
| The Förster–Hoffmann equation..... | 1  |
| Fig. S1.....                       | 2  |
| Fig. S2.....                       | 2  |
| Fig. S3.....                       | 3  |
| Fig. S4.....                       | 4  |
| Fig. S5.....                       | 4  |
| Fig. S6.....                       | 5  |
| Fig. S7.....                       | 6  |
| Fig. S8.....                       | 7  |
| Fig. S9.....                       | 8  |
| Fig. S10.....                      | 9  |
| Fig. S11.....                      | 9  |
| Fig. S12.....                      | 10 |
| Fig. S13.....                      | 10 |
| Fig. S14.....                      | 11 |
| Fig. S15.....                      | 12 |
| Fig. S16.....                      | 13 |
| Fig. S17.....                      | 14 |
| Table S1.....                      | 15 |
| Table S2.....                      | 17 |
| Table S3.....                      | 17 |
| References.....                    | 18 |

### **The Förster–Hoffmann equation**

According to the previous studies,<sup>1</sup> the relationship between the fluorescence intensity of the molecular rotor DPADQ and the viscosity can be determined by the following Förster–Hoffmann equation:

$$\log I = C + x \log \eta \quad (1)$$

where  $\eta$  represents the viscosity,  $I$  represents the fluorescence intensity of the molecular rotor DPADQ at 725 nm,  $C$  is a constant, and  $x$  represents the sensitivity of the molecular rotor towards viscosity.

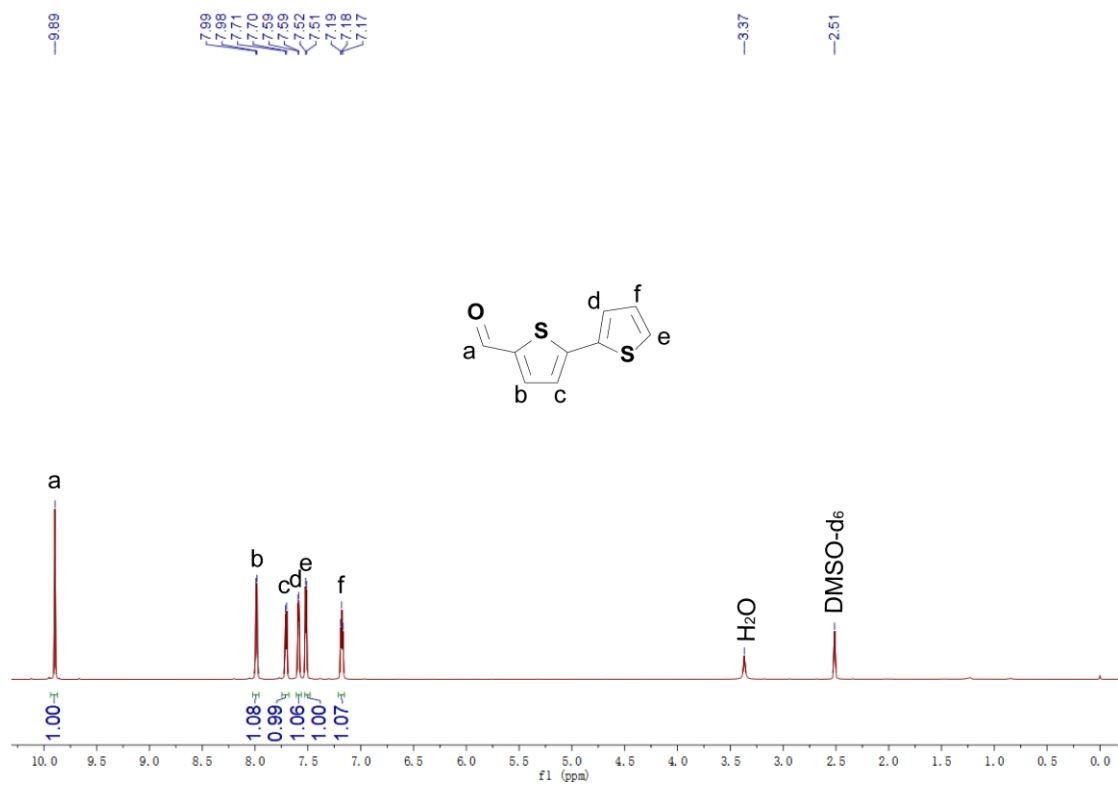

**Fig. S1** <sup>1</sup>H-NMR spectrum of Compound 1 in DMSO-d<sub>6</sub>.

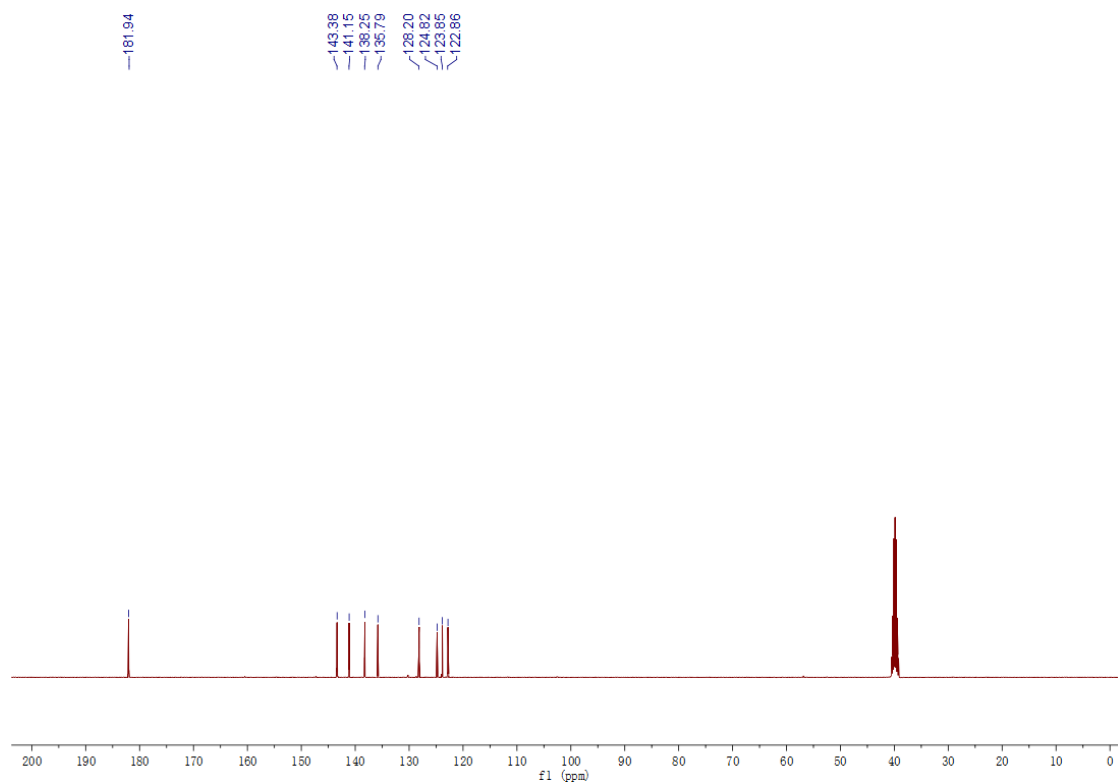

**Fig. S2** <sup>13</sup>C-NMR spectrum of Compound 1 in DMSO-d<sub>6</sub>.

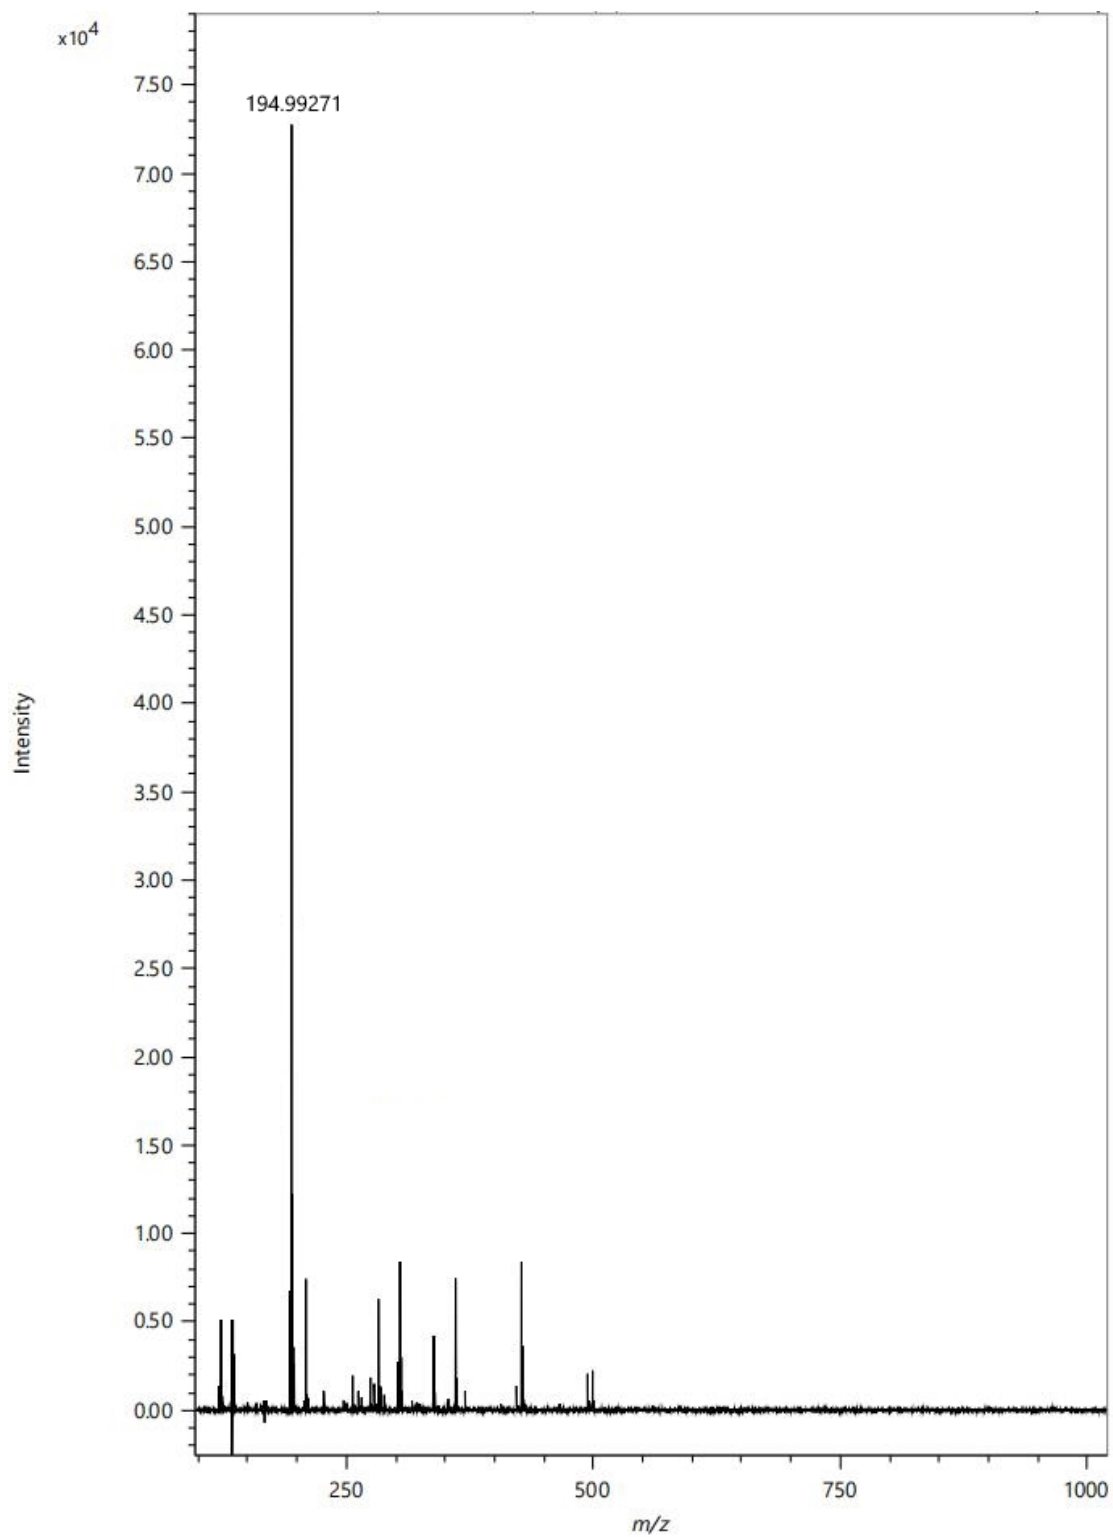

**Fig. S3** HR mass spectrum of Compound 1. MS (ESI):  $m/z$  194.99271  $[M+H]^+$ .

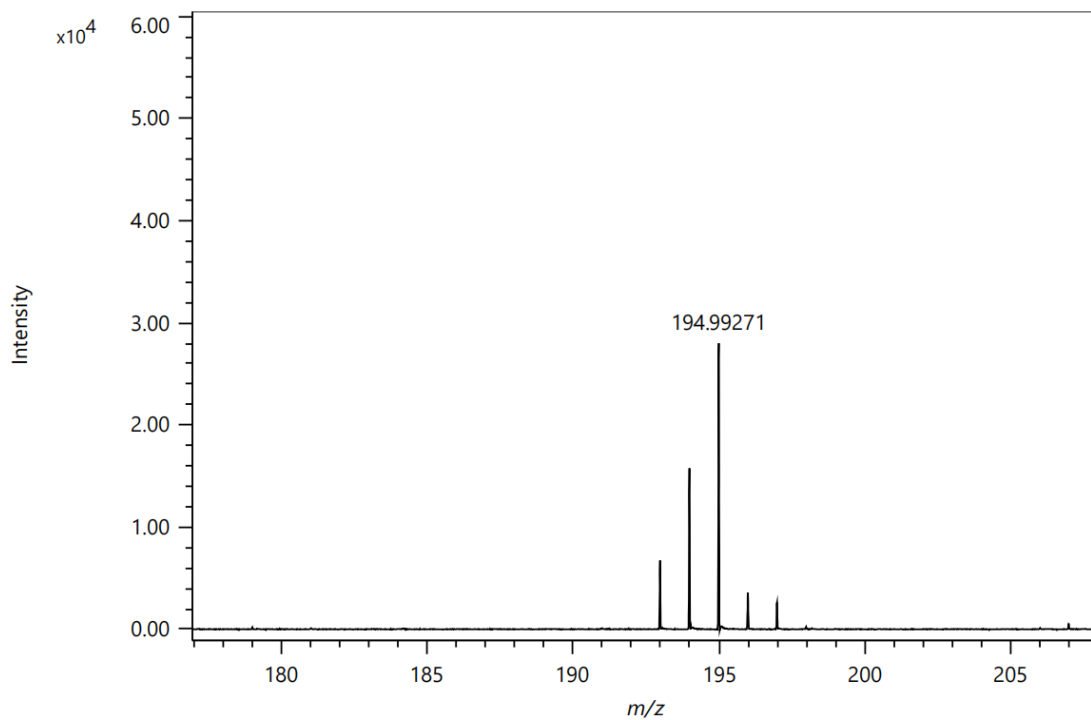

**Fig. S4** Partial enlargement of the spectrum focusing on Compound 1  $[M+H]^+$ .

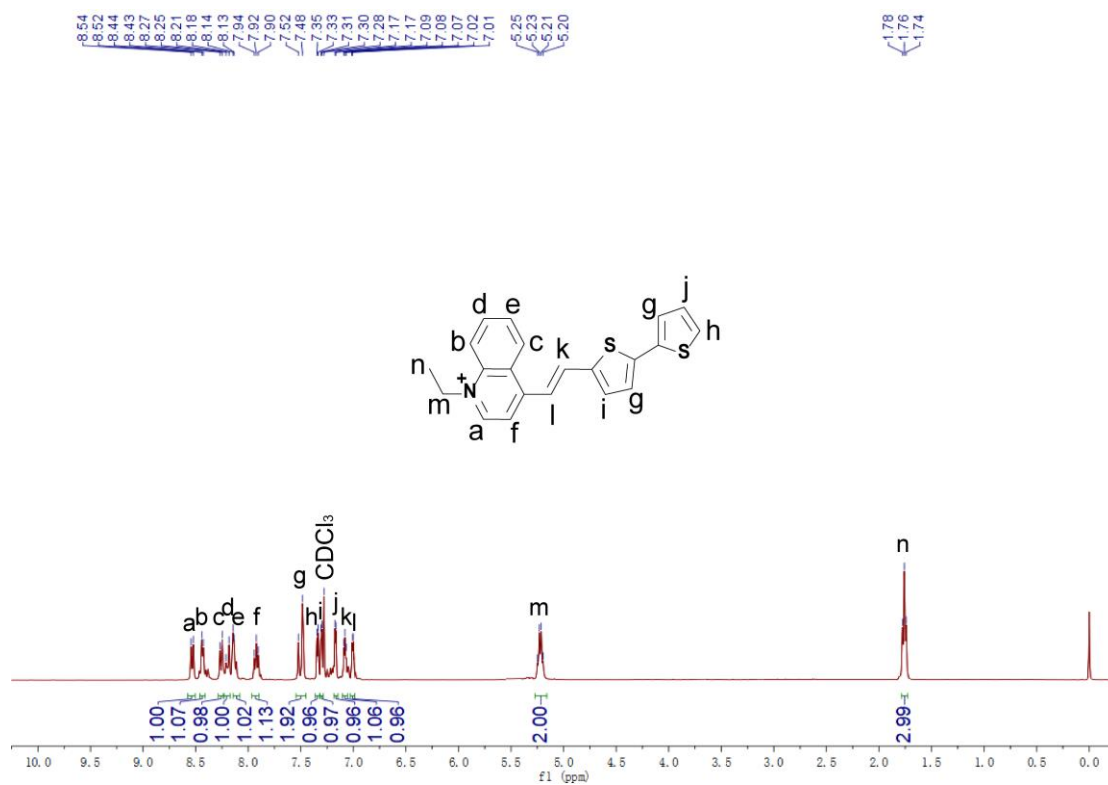

**Fig. S5**  $^1\text{H-NMR}$  spectrum of the molecular rotor BTPEQ in  $\text{CDCl}_3$ .

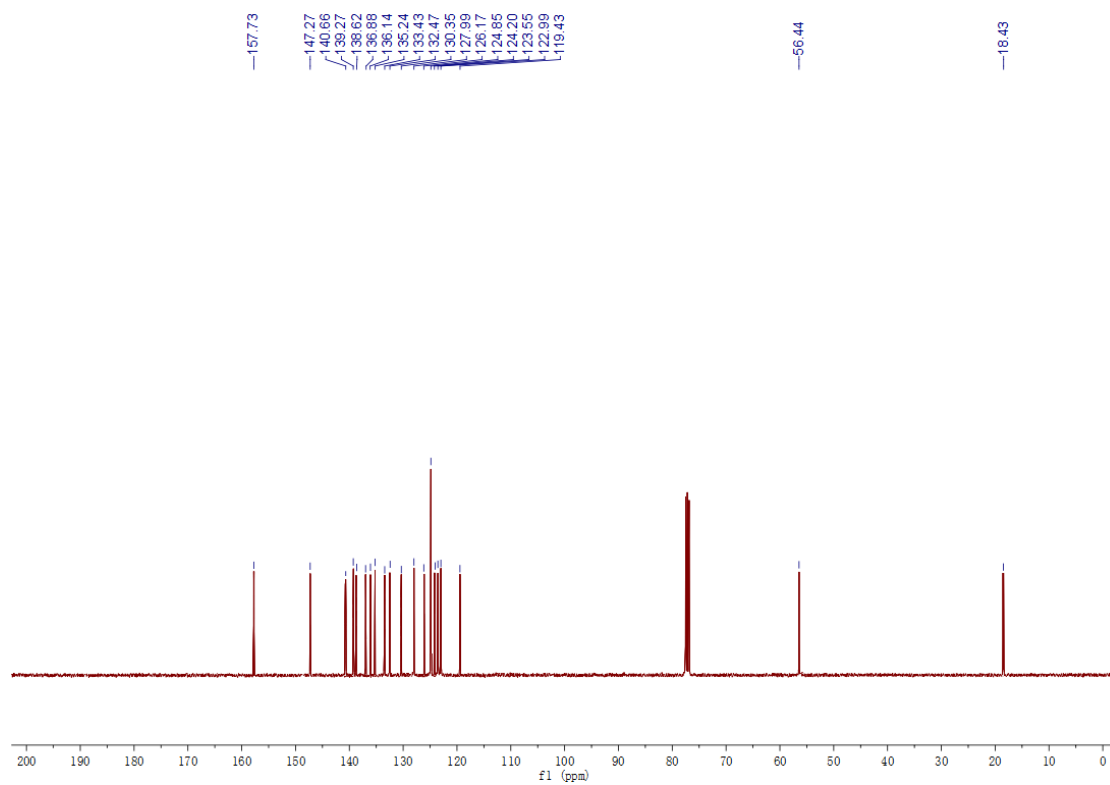

**Fig. S6**  $^{13}\text{C}$ -NMR spectrum of the molecular rotor BTPEQ in  $\text{CDCl}_3$ .

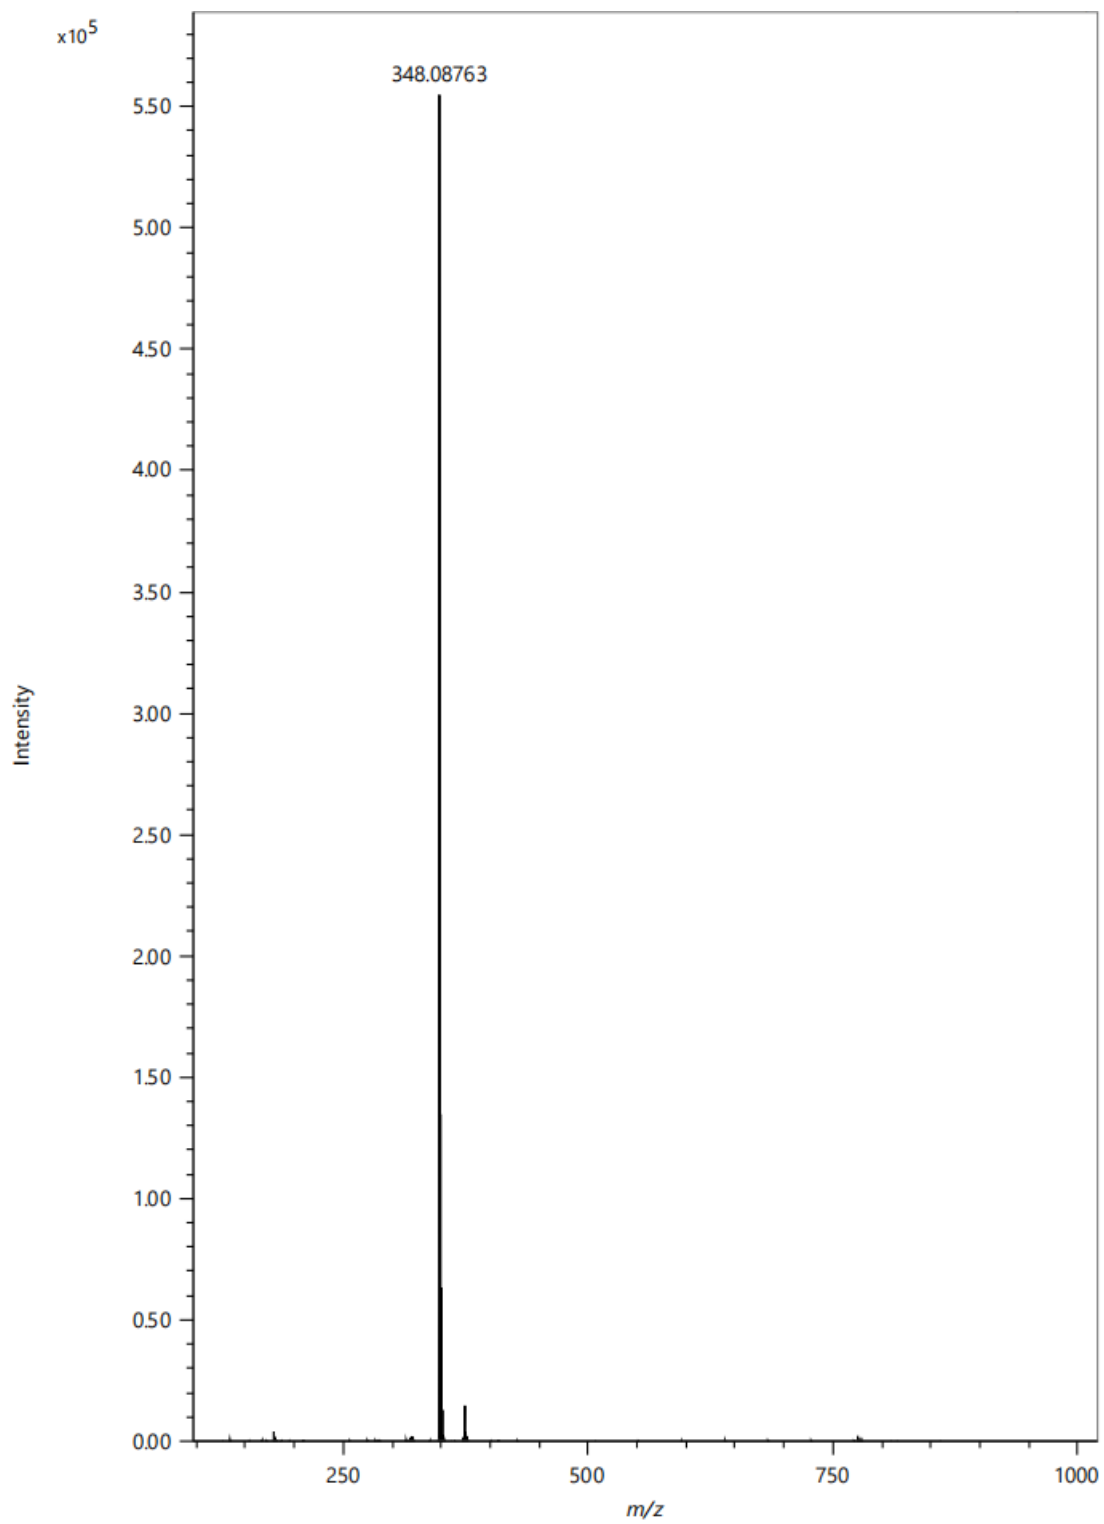

**Fig. S7** HR mass spectrum of molecular rotor BTPEQ. MS (ESI):  $m/z$  348.08763

$[M]^+$ .



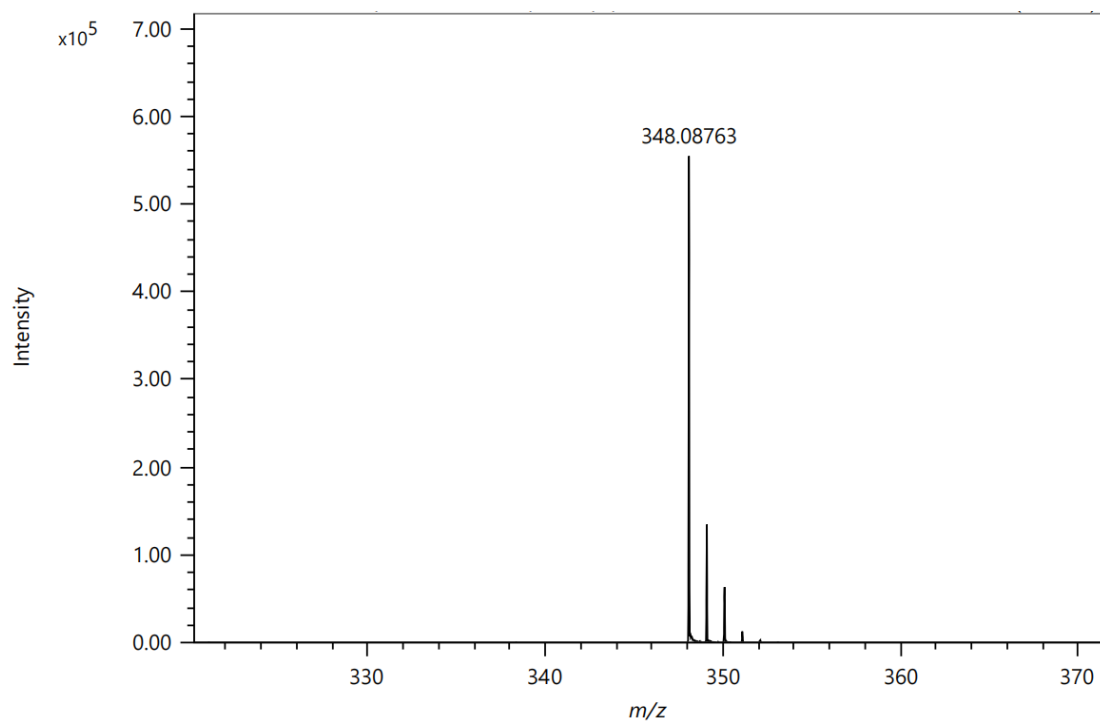

**Fig. S8** Partial enlargement of the spectrum focusing on molecular rotor BTPEQ

$[M]^+$ .

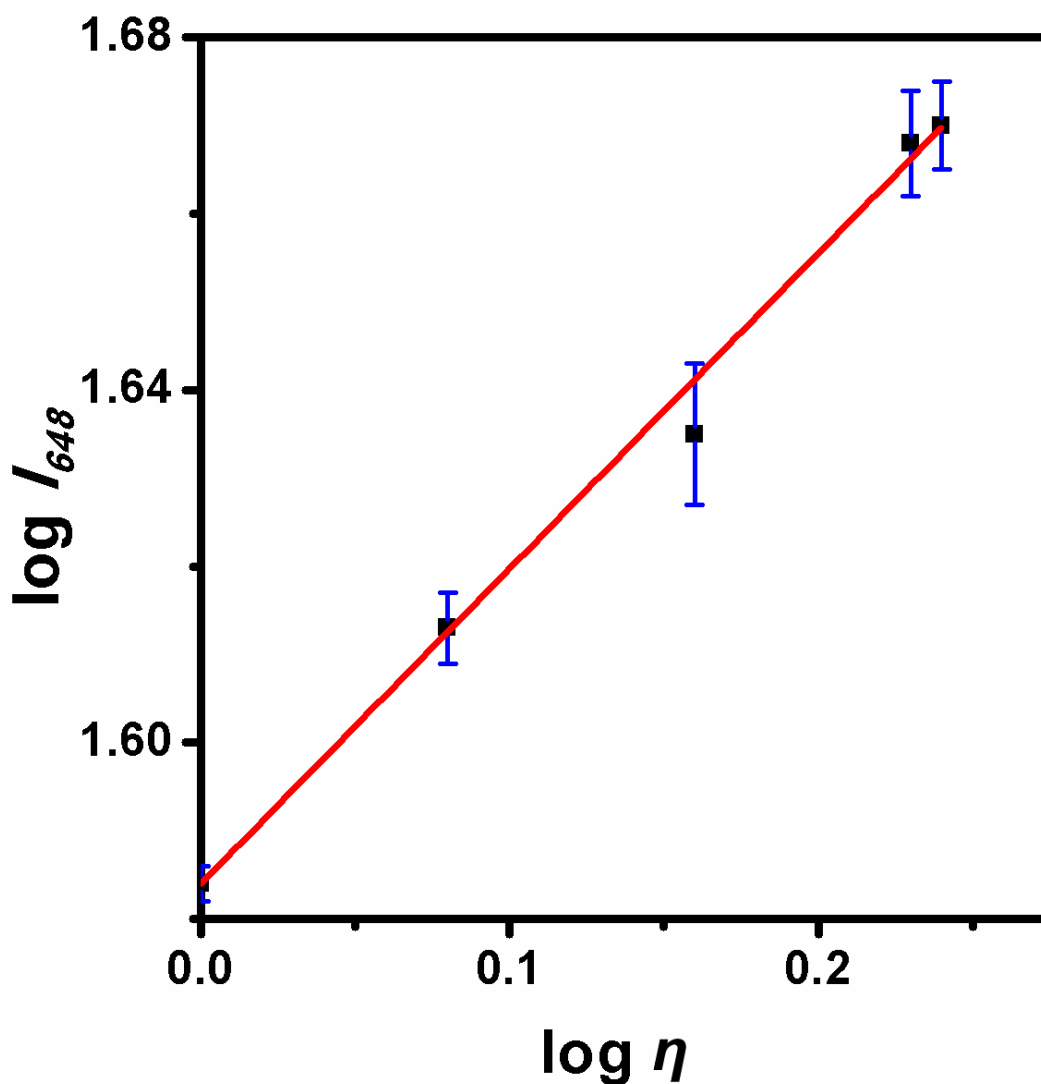

**Fig. S9** Detection limit of the rotor BTPEQ.

The calibration curve was first obtained from the plot of  $\log(I_{648})$  as a function of  $\log(\eta)$ . Then the regression curve equation was obtained for the lower viscosity part.

The detection limit =  $3 \times S.D./k$

Where  $k$  is the slope of the curve equation, and  $S.D.$  represents the standard deviation for the  $\log(I_{648})$  of molecular rotor DPPBQD.

$$\log(I_{648}) = 1.583 + 0.357 \times \log(\eta) \quad (R^2 = 0.991)$$

$$\log(\text{LOD}) = 3 \times 0.002/0.357 = 0.017$$

$$\text{LOD} = 10^{0.036} = 1.040 \text{ cP}$$

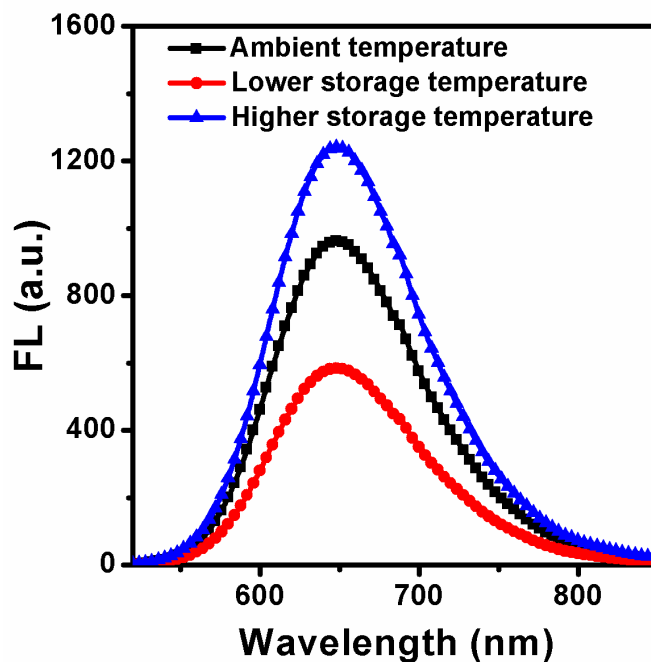

**Fig. S10** Fluorescence spectra of the rotor BTPEQ (10  $\mu$ M) in glycerol under different temperature, including the ambient temperature (25  $^{\circ}$ C), higher storage temperature (37  $^{\circ}$ C), and lower storage temperature (5  $^{\circ}$ C).

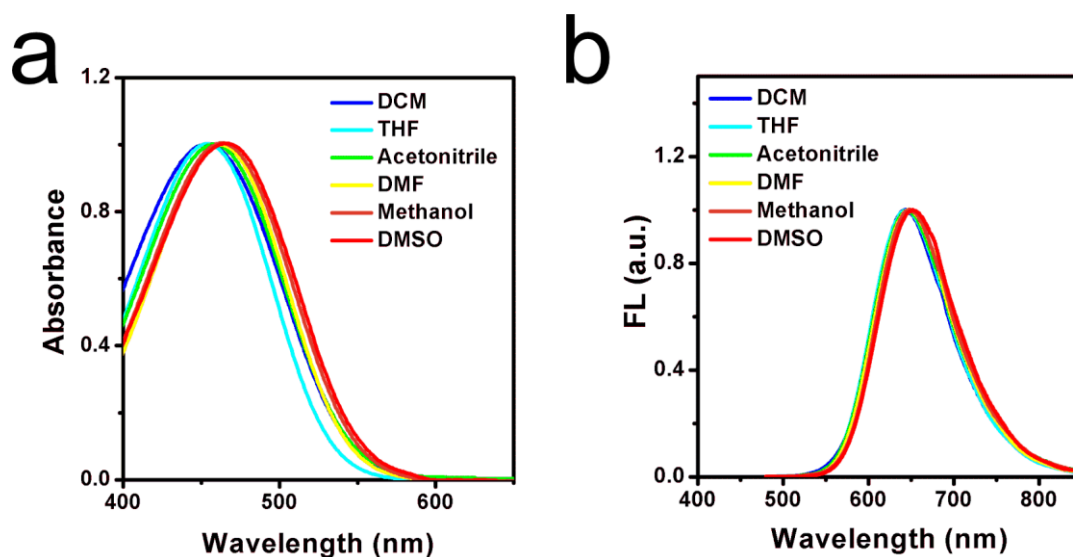

**Fig. S11** (a) Normalized absorption spectra of molecular rotor BTPEQ in six kinds of common solvents. (b) Normalized fluorescence emission spectra in six kinds of common solvents.

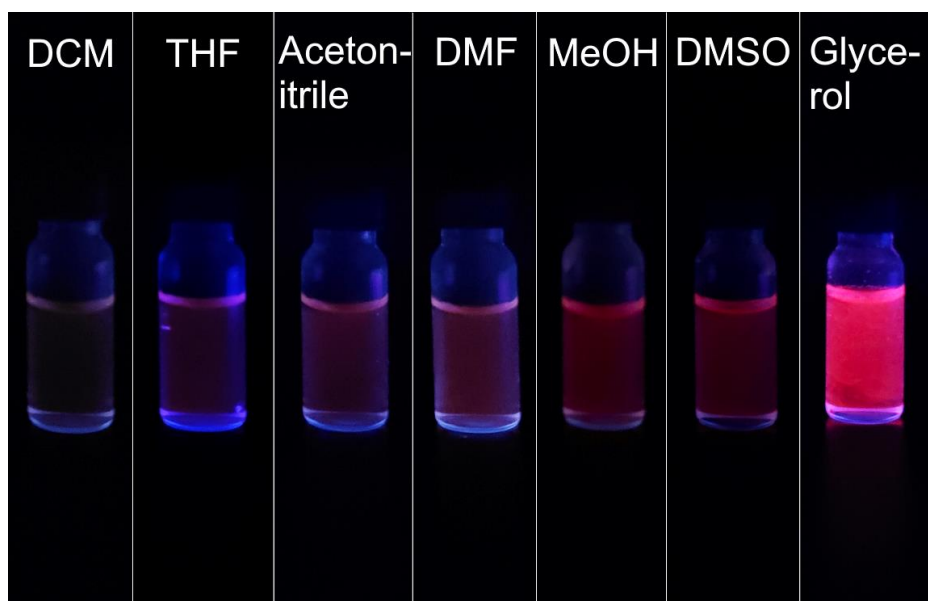

**Fig. S12** Fluorescence images of the rotor BTPEQ in various solvents.

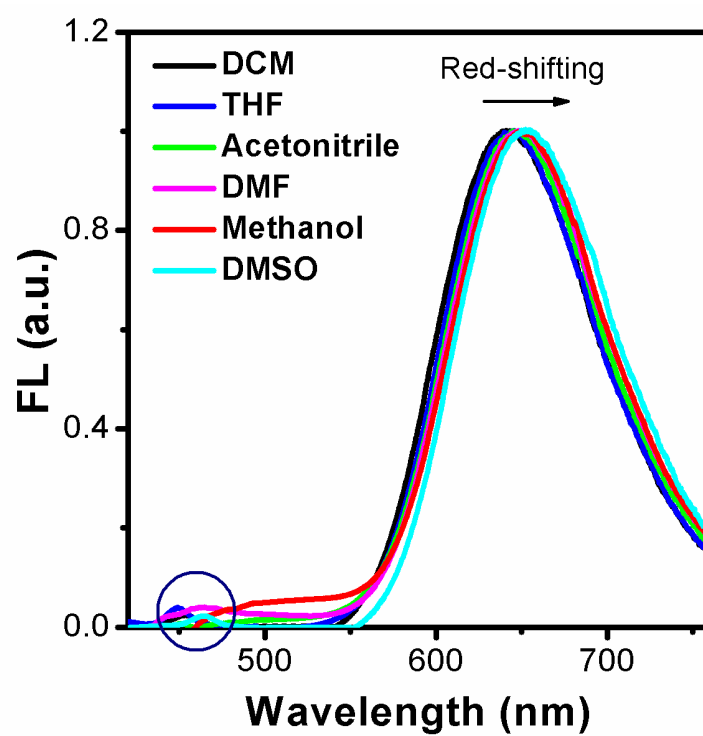

**Fig. S13** Normalized dual emission spectra of the rotor BTPEQ in various solvents.

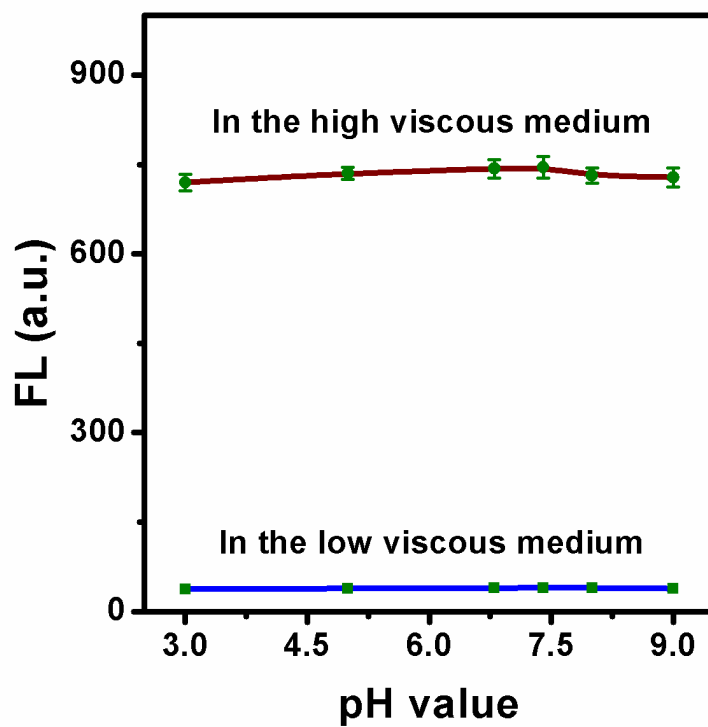

**Fig. S14** Fluorescence emission intensity of the molecular rotor BTPEQ (10  $\mu$ M) at 648 nm under various pH values (containing 1% DMSO) in low viscosity water and in high viscosity glycerol,  $\lambda_{\text{ex}}=488$  nm.

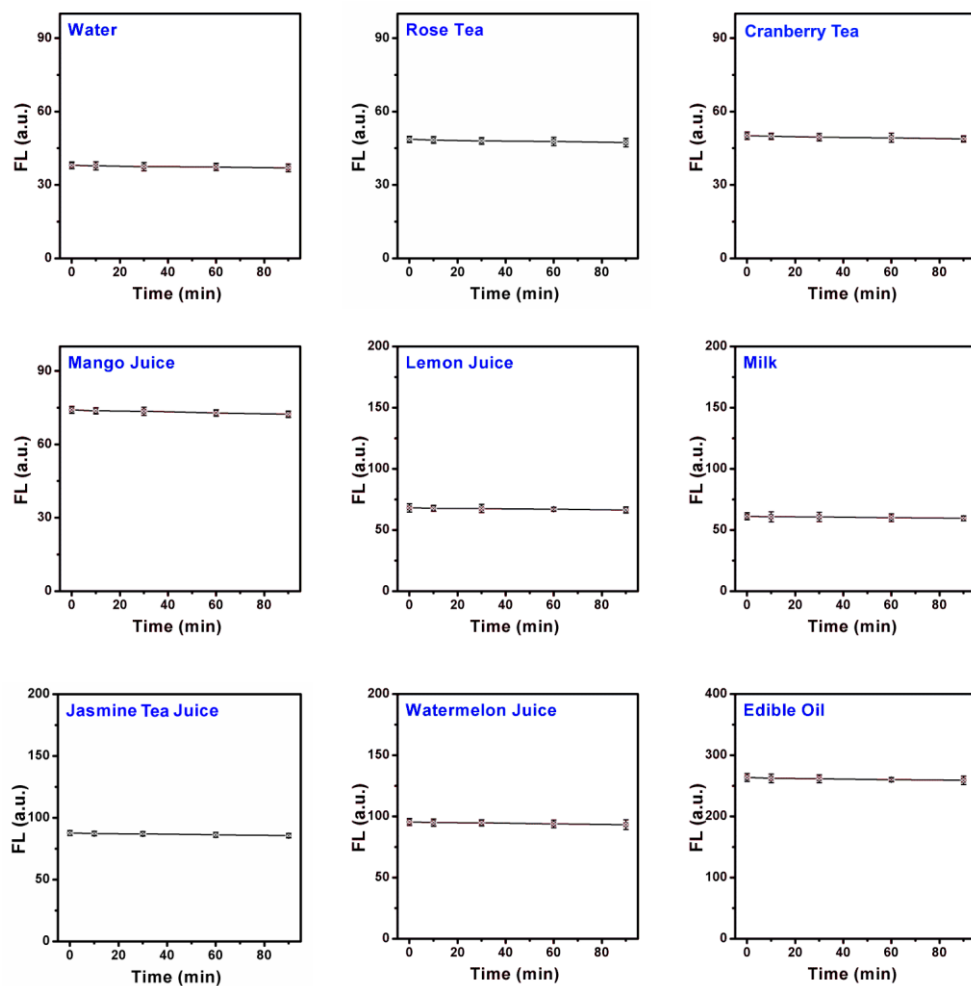

**Fig. S15** Photostability analysis of the molecular rotor BTPEQ in water (containing 1% DMSO) and other eight kinds of common liquid food (containing 1% DMSO). All upon samples were tested under continuous light irradiation with 488 nm UV lamp.

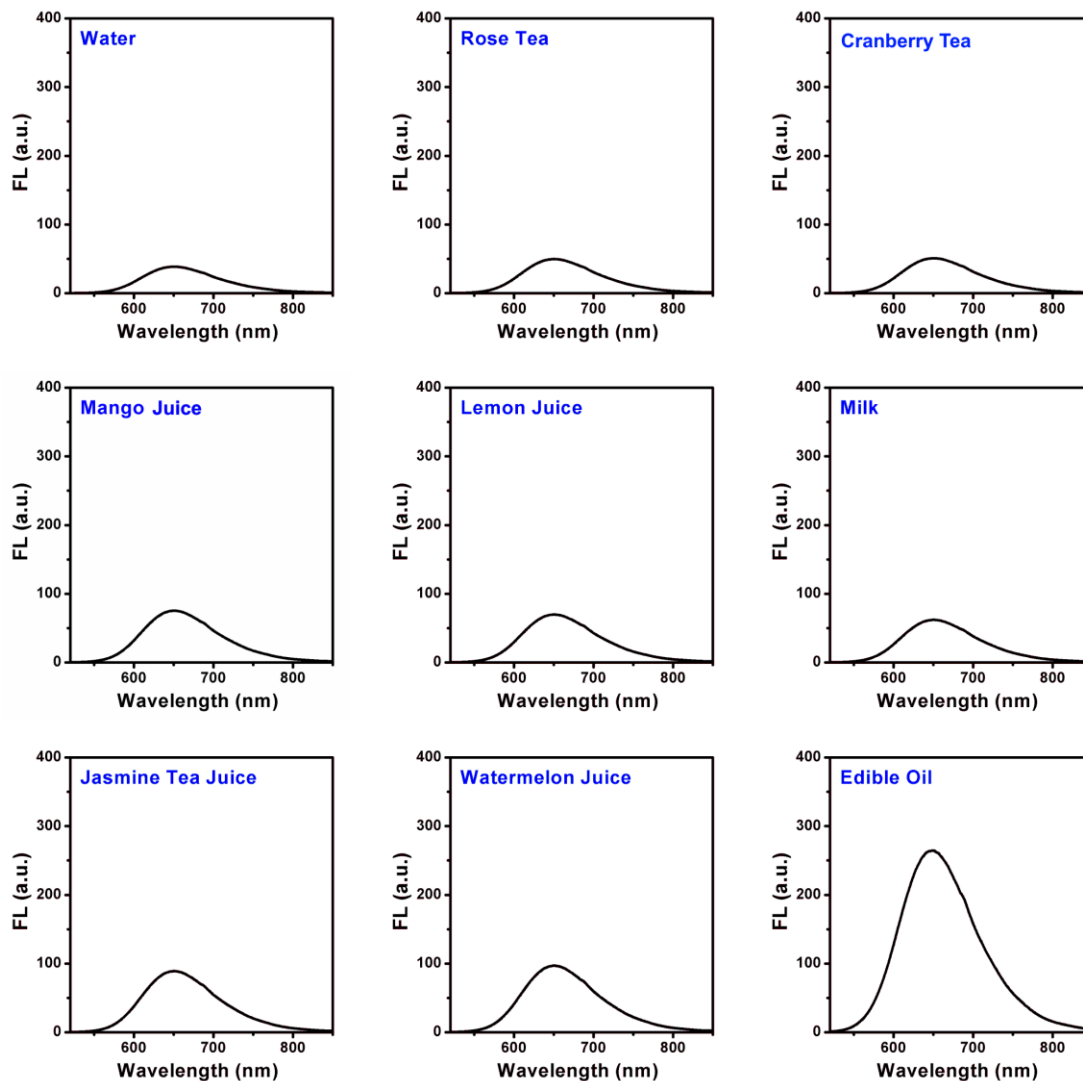

**Fig. S16** Fluorescence spectra of the molecular rotor BTPEQ (10  $\mu\text{M}$ , containing 1% DMSO) in nine kinds of common liquid food, including the water, rose tea, cranberry tea, mango juice, lemon juice, milk, jasmine tea juice, watermelon juice and edible oil,  $\lambda_{\text{ex}}=488$  nm.

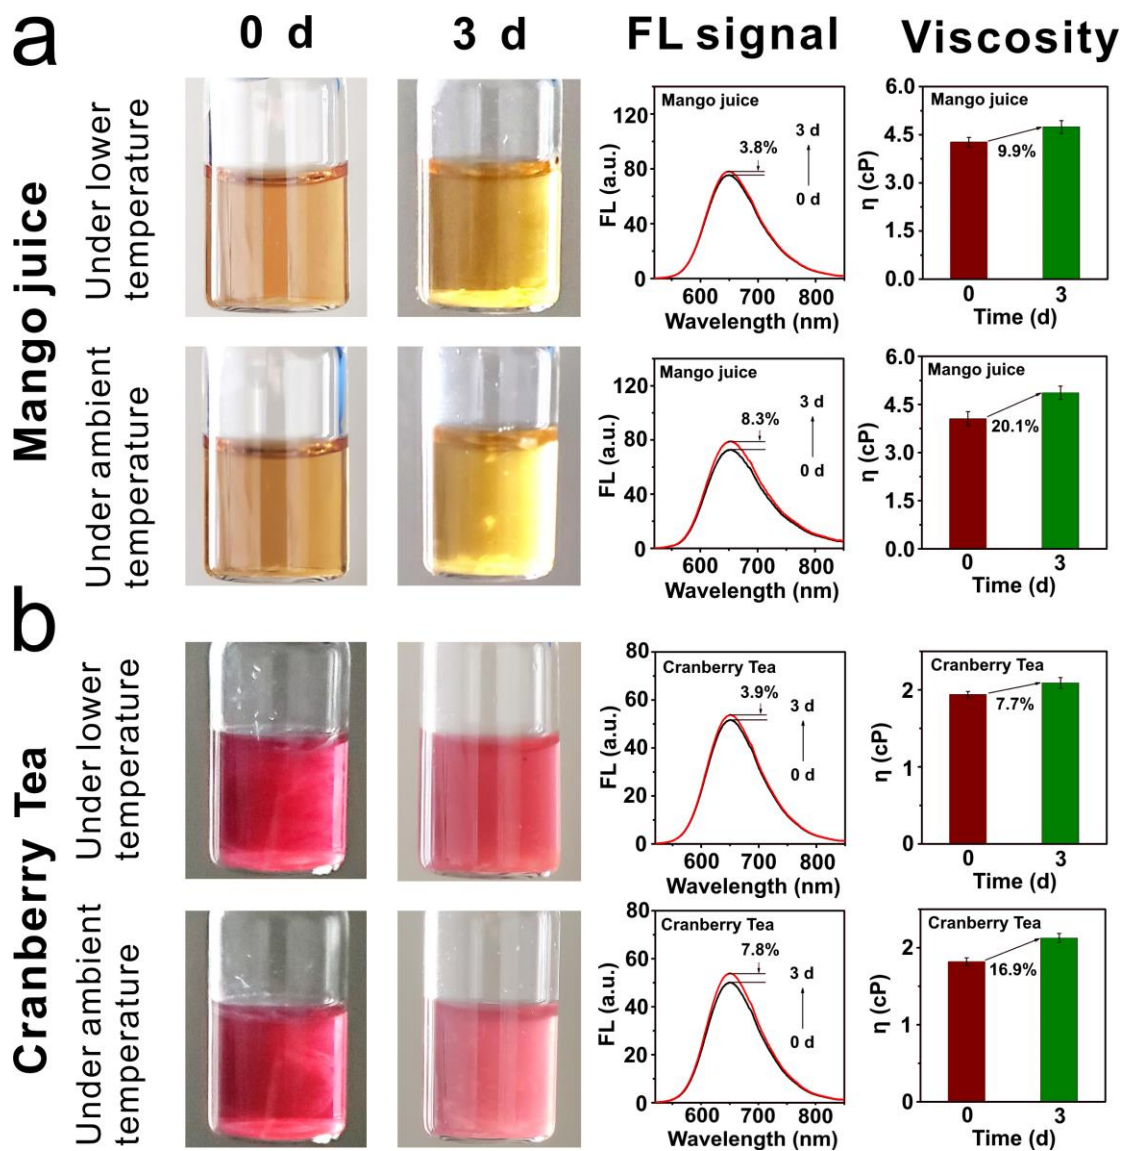

**Fig. S17** Digital images of the mango juice (a) and cranberry tea (b) that stored under ambient temperature and lower temperature which containing *Escherichia Coli* for varying time (from 0 to 3 days), corresponding fluorescence spectra and viscosity values at different time intervals. Concentration of BTPEQ = 10  $\mu$ M,  $\lambda_{ex}$ =488 nm.



**Table S1.** Comparison of the representative fluorescence-based dyes for viscosity detection reported in recent years.

| Probe                                                                               | $\lambda_{ab}^*$ | $\lambda_{em}^{**}$ | Stokes shift <sup>***</sup> | Application                                 | Reference |
|-------------------------------------------------------------------------------------|------------------|---------------------|-----------------------------|---------------------------------------------|-----------|
| 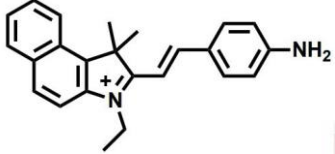   | 511 nm           | 583 nm              | 72 nm                       | Biological system, living cells.            | 2         |
|    | 530 nm           | 620 nm              | 90 nm                       | Biological system, living cells.            | 3         |
|    | 560 nm           | 580 nm              | 20 nm                       | Biological system, living cells.            | 4         |
|  | 600 nm           | 635 nm              | 35 nm                       | Biological system, living cells, in vivo.   | 5         |
|  | 580 nm           | 635 nm              | 55 nm                       | Biological system, living cells.            | 6         |
|  | 678 nm           | 698 nm              | 20 nm                       | Biological system, living cells, rat slice. | 7         |
|  | 545 nm           | 628 nm              | 83 nm                       | Biological system, living cells.            | 8         |

|                                                                                     |        |        |        |                                                   |           |
|-------------------------------------------------------------------------------------|--------|--------|--------|---------------------------------------------------|-----------|
| 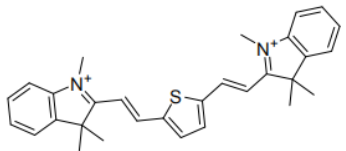   | 525 nm | 595 nm | 70 nm  | Biological system, living cell.                   | 9         |
|    | 520 nm | 610 nm | 90 nm  | Biological system, living cell, zebra fish, mice. | 10        |
|    | 470 nm | 560 nm | 90 nm  | Biological system, living cell.                   | 11        |
|   | 520 nm | 580 nm | 60 nm  | Biological system, living cell.                   | 12        |
|  | 488 nm | 648 nm | 160 nm | Liquid food, food spoilage analysis.              | This work |

\* Absorption peak. The absorption was measured in the glycerol.

\*\* Emission peak. The fluorescence emission was measured in the glycerol.

\*\*\* The Stokes shift herein was obtained from the absorption and emission measured in the glycerol.

**Table S2.** Photo-physical properties of the molecular rotor BTPEQ in different solvents.

| Solvents     | Dielectric constant ( $\epsilon$ ) | $\eta$ (cP) | Absorption $\lambda_{ab}$ (nm) | Emission $\lambda_{em}$ (nm) |
|--------------|------------------------------------|-------------|--------------------------------|------------------------------|
| Toluene      | 2.4                                | 0.6         | 448.2                          | 632.3                        |
| DCM          | 8.9                                | 0.4         | 452.3                          | 641.1                        |
| THF          | 7.4                                | 0.5         | 453.2                          | 642.1                        |
| Acetonitrile | 37.5                               | 0.4         | 458.4                          | 645.6                        |
| DMF          | 36.7                               | 0.8         | 460.1                          | 646.2                        |
| Methanol     | 32.6                               | 0.6         | 463.2                          | 650.7                        |
| DMSO         | 46.8                               | 2.1         | 465.3                          | 651.3                        |
| Water        | 78.5                               | 1.0         | 466.1                          | 653.1                        |
| Glycerol     | 45.8                               | 956.0       | 488.3                          | 648.3                        |

**Table S3.** Viscosity values of the beverages determined by viscometer.

| Beverages         | Viscosity (cP) | Calculated (cP) |
|-------------------|----------------|-----------------|
| Water             | 1.00           | 1.01            |
| Rose Tea          | 1.71           | 1.73            |
| Cranberry Tea     | 1.85           | 1.88            |
| Mango Juice       | 4.22           | 4.25            |
| Lemon Juice       | 3.50           | 3.54            |
| Milk              | 2.82           | 2.85            |
| Jasmine Tea Juice | 6.20           | 6.14            |
| Watermelon Juice  | 7.50           | 7.45            |
| Edible Oil        | 68.10          | 68.25           |

## References

- 1 I. E. Steinmark, P.-H. Chung, R. M. Ziolek, B. Cornell, P. Smith, J. A. Levitt, C. Tregidgo, C. Molteni, G. Yahioğlu, C. D. Lorenz and K. Suhling, *Small*, 2020, **16**, 1907139.
- 2 B. Chen, C. Li, J. Zhang, J. Kan, T. Jiang, J. Zhou and H. Ma, *Chem. Commun.*, 2019, **55**, 7410–7413.
- 3 G. Zhang, Y. Sun, X. He, W. Zhang, M. Tian, R. Feng, R. Zhang, X. Li, L. Guo, X. Yu and S. Zhang, *Anal. Chem.*, 2015, **87**, 12088–12095.
- 4 L.-L. Li, K. Li, M.-Y. Li, L. Shi, Y.-H. Liu, H. Zhang, S.-L. Pan, N. Wang, Q. Zhou and X.-Q. Yu, *Anal. Chem.*, 2018, **90**, 5873–5878.
- 5 M. Ren, L. Wang, X. Lv, J. Liu, H. Chen, J. Wang and W. Guo, *J. Mater. Chem. B*, 2019, **7**, 6181–6186.
- 6 L. Zhu, M. Fu, B. Yin, L. Wang, Y. Chen and Q. Zhu, *Dye. Pigment.*, 2020, **172**, 107859.
- 7 S. J. Park, B. K. Shin, H. W. Lee, J. M. Song, J. T. Je and H. M. Kim, *Dye. Pigment.*, 2020, **174**, 108080.
- 8 K. Zhou, M. Ren, B. Deng and W. Lin, *New J. Chem.*, 2017, **41**, 11507–11511.
- 9 Y. Baek, S. J. Park, X. Zhou, G. Kim, H. M. Kim and J. Yoon, *Biosens. Bioelectron.*, 2016, **86**, 885–891.
- 10 J. Yin, M. Peng and W. Lin, *Anal. Chem.*, 2019, **91**, 8415–8421.
- 11 Z. Zou, Q. Yan, S. Ai, P. Qi, H. Yang, Y. Zhang, Z. Qing, L. Zhang, F. Feng and R. Yang, *Anal. Chem.*, 2019, **91**, 8574–8581.
- 12 L. He, Y. Yang and W. Lin, *Anal. Chem.*, 2019, **91**, 15220–15228.
